# Supplementary material for: Metabonomics analysis of quercetin against the nephrotoxicity of acrylamide in rats
Source: Royal Society of Chemistry journal article supplement (doi:10.1039/c8fo00902c), 2018-01-01
Supplement: c8fo00902c1.pdf [file c8fo00902c1.pdf]

**Supplementary Table 1** The results from CV-ANOVA of the positive PLS-DA model

|                 | SS    | DF | MS   | F       | P         | SD   |
|-----------------|-------|----|------|---------|-----------|------|
| Total corrected | 59    | 59 | 1    |         |           | 1    |
| Regression      | 49.96 | 12 | 4.16 | 21.6373 | 3.52e-015 | 2.04 |

CV: cross-validation; ANOVA: analysis of variance; SS, sum of squares of deviation from mean; DF, degrees of freedom; MS, mean square; SD, standard deviation.

**Supplementary Table 2** The results from CV-ANOVA of the negative PLS-DA model

|                 | SS    | DF | MS   | F     | P         | SD   |
|-----------------|-------|----|------|-------|-----------|------|
| Total corrected | 59    | 59 | 1    |       |           | 1    |
| Regression      | 40.69 | 10 | 4.07 | 10.89 | 1.91e-009 | 2.02 |

CV: cross-validation; ANOVA: analysis of variance; SS, sum of squares of deviation from mean; DF, degrees of freedom; MS, mean square; SD, standard deviation.

**Supplementary Table 3** Renal biomarkers identified after treatment in positive and negative mode.

| Retention time (min) | Measured mass (Da) | Calculated mass (Da) | Mass error (Da) | Elemental composition | Scan mode | Metabolite                         |
|----------------------|--------------------|----------------------|-----------------|-----------------------|-----------|------------------------------------|
| 1.05                 | 203.1153           | 203.1158             | -0.0005         | C9H17NO4              | +         | L -Acetylcarnitine <sup>a, b</sup> |
| 1.18                 | 168.0278           | 168.0283             | -0.0005         | C5H4N4O3              | +         | Uric acid <sup>a, b</sup>          |
| 1.54                 | 153.0404           | 153.0407             | -0.0003         | C5H9N3O4              | +         | 6,8-Dihydroxypurine <sup>a</sup>   |
| 1.68                 | 136.0749           | 136.0757             | -0.0008         | C8H9NO                | +         | 2-Phenylacetamide <sup>a, b</sup>  |
| 2.07                 | 136.0382           | 136.0385             | -0.0003         | C5H4N4O               | +         | Hypoxanthine <sup>a, b</sup>       |
| 2.07                 | 283.0918           | 283.0917             | 0.0001          | C10H13N5O5            | +         | Guanosine <sup>a, b</sup>          |
| 2.50                 | 166.0854           | 166.0863             | -0.0009         | C10H12N4O6            | +         | L -Phenylalanine <sup>a, b</sup>   |
| 2.68                 | 384.1147           | 384.1150             | -0.0003         | C14H17N5O8            | +         | Succinyladenosine <sup>a</sup>     |
| 2.69                 | 219.1100           | 219.1107             | -0.0007         | C9H17NO5              | +         | Pantothenic acid <sup>a, b</sup>   |
| 3.14                 | 205.0966           | 205.0972             | -0.0006         | C11H12N2O2            | +         | Tryptophan <sup>a, b</sup>         |
| 11.34                | 495.3331           | 495.3325             | 0.0006          | C24H50NO7P            | +         | LPC(16:0) <sup>a</sup>             |
| 11.50                | 521.3494           | 521.3481             | 0.0013          | C26H52NO7P            | +         | LPC(18:1(9z)) <sup>a</sup>         |
| 1.78                 | 268.0728           | 268.0808             | -0.0026         | C10H12N4O5            | -         | Inosine <sup>a, b</sup>            |
| 7.69                 | 564.3318           | 564.3307             | 0.0011          | C26H50NO7P            | -         | LPC(18:2(9z,12z)) <sup>a</sup>     |

Note: <sup>a</sup> The metabolite was confirmed by comparison to the metabolites of the Human Metabolome Database (HMDB). <sup>b</sup> The metabolite was identified by comparison to the standard.

**Supplementary Table 4** Mass fragment information of potential biomarkers.

| <b>Metabolite identification</b> | <b>Scan mode</b> | <b>Accurate mass (Da)</b> | <b>Fragmentation pattern (Da)</b>                     |
|----------------------------------|------------------|---------------------------|-------------------------------------------------------|
| L-Acetylcarnitine                | +                | 203.12                    | 144.04, 130.02, 100.11                                |
| Uric acid                        | +                | 168.03                    | 151.86, 150.86, 125.95, 95.99                         |
| 6,8-Dihydroxypurine              | +                | 153.04                    | 135.03, 111.02, 110.03                                |
| 2-Phenylacetamide                | +                | 136.07                    | 135.07, 120.04, 119.05, 118.07, 92.06, 91.05, 90.05   |
| Hypoxanthine                     | +                | 136.04                    | 118.98, 109.93, 93.99, 92.05, 82.03                   |
| Guanosine                        | +                | 283.09                    | 213.33, 182.03, 172.20, 152.05, 136.05                |
| L -Phenylalanine                 | +                | 166.09                    | 121.08, 120.08, 118.07, 103.05                        |
| Succinyladenosine                | +                | 384.11                    | 252.07, 234.06, 206.07, 192.05, 136.06                |
| Pantothenic acid                 | +                | 219.11                    | 202.20, 184.10, 132.40, 102.80, 83.30, 71.10          |
| Tryptophan                       | +                | 205.10                    | 189.07, 188.07, 187.09, 147.06, 146.12                |
| LPC(16:0)                        | +                | 495.33                    | 478.33, 184.07, 104.11                                |
| LPC(18:1(9z))                    | +                | 521.35                    | 504.48, 445.44, 339.12, 258.08, 184.00, 104.08, 86.08 |
| Inosine                          | -                | 268.07                    | 249.40, 149.96, 133.85, 135.10, 108.04                |
| LPC(18:2(9z,12z))                | -                | 564.33                    | 505.27, 504.27                                        |

**Supplementary Table 5** Intensities of metabolites identified in the positive and negative mode

| Group | Hypoxanthine         | Succinyladenosine | Urid acid           | Guanosine        | 6,8-Dihydroxypurine | L -Acetylcarnitine   | L -Phenylalanine      |
|-------|----------------------|-------------------|---------------------|------------------|---------------------|----------------------|-----------------------|
| C     | 22945.5±5004.6       | 1846.4±302.0      | 79002.0±14123.2     | 744.4±108.7      | 8493.2±1285.2       | 33639.1±4479.4       | 4141.4±496.9          |
| Q1    | 22755.5±5373.2       | 1833.6±452.5      | 80969.1±11252.8     | 744.5±133.7      | 8443.5±1283.3       | 34517.0±4459.0       | 4027.6±413.4          |
| Q2    | 20395.0±2387.2       | 1785.7±290.0      | 73802.2±11286.3     | 632.7±109.0      | 7486.8±1287.8       | 36371.1±4839.9       | 3886.3±417.8          |
| A     | 36855.6±5134.9**     | 2571.4±348.2**    | 109024.5±10204.3**  | 1160.8±163.7**   | 15568.1±3029.3**    | 22804.4±3138.1**     | 6479.8±674.0**        |
| AQ1   | 34797.0±5996.5**     | 2447.4±507.8**    | 106366.8±19789.9**  | 1141.5±170.3**   | 14084.5±2741.6**    | 22796.8±2918.5**     | 6275.4±720.7**        |
| AQ2   | 29339.1±3964.0**, ## | 2202.0±368.2*, #  | 95198.3±17852.3*, # | 893.0±114.2*, ## | 10542.5±2628.5*, ## | 27896.4±3619.4**, ## | 5290.5±862.7**,<br>## |

C, control group; Q1, low-dose quercetin-treated group; Q2, high-dose quercetin-treated group; A, AA-treated group; AQ1, low-dose quercetin plus AA treated group; AQ2, high-dose quercetin plus AA-treated group. Values expressed as mean ± SD (n = 10).

\* Significantly different from the control group at p < 0.05 (one-way ANCOVA). \*\* Significantly different from the control group at p < 0.01 (one-way ANCOVA).

# Significantly different from the AA group at p < 0.05 (one-way ANCOVA). ## Significantly different from the AA group at p < 0.01 (one-way ANCOVA).

**Supplementary Table 5 (continue)** Intensities of metabolites identified in the positive and negative mode

| Group | Pantothenic acid | Tryptophan        | LPC(16:0)            | LPC(18:1(9z))         | 2-Phenylacetamide  | Inosine               | LPC(18:2(9z,12z)) |
|-------|------------------|-------------------|----------------------|-----------------------|--------------------|-----------------------|-------------------|
| C     | 1316.3±273.9     | 1363.3±259.7      | 79790.2±9067.0       | 5728.4±490.3          | 31691.6±5421.5     | 20739.5±1742.1        | 3881.5±567.3      |
| Q1    | 1334.6±259.21    | 1368.4±276.6      | 80943.0±8033.0       | 5704.8±691.0          | 31301.4±8029.2     | 20345.7±2695.7        | 3865.5±634.4      |
| Q2    | 1428.7±250.8     | 1273.7±250.7      | 78016.6±8394.4       | 5611.3±772.8          | 32727.9±5969.8     | 19994.7±2601.7        | 3710.2±611.0      |
| A     | 914.5±134.8**    | 2265.2±504.3**    | 109462.3±16443.8**   | 9235.2±1302.0**       | 20163.8±3802.9**   | 47775.6±5273.0**      | 5186.9±937.8**    |
| AQ1   | 910.1±111.8**    | 2058.6±481.4**    | 106384.5±15989.8**   | 9185.5±1129.2**       | 21962.8±3064.4**   | 45204.2±5927.9**      | 5136.6±889.8**    |
| AQ2   | 1123.7±158.8*, # | 1783.6±391.7*, ## | 94432.3±8997.8**, ## | 6930.2±835.2**,<br>## | 26193.0±3573.6*, # | 33503.4±4841.5*,<br># | 4537.5±494.5*, #  |

C, control group; Q1, low-dose quercetin-treated group; Q2, high-dose quercetin-treated group; A, AA-treated group; AQ1, low-dose quercetin plus AA treated group; AQ2, high-dose quercetin plus AA-treated group. Values expressed as mean ± SD (n = 10).

\* Significantly different from the control group at p < 0.05 (one-way ANCOVA). \*\* Significantly different from the control group at p < 0.01 (one-way ANCOVA).

# Significantly different from the AA group at p < 0.05 (one-way ANCOVA). ## Significantly different from the AA group at p < 0.01 (one-way ANCOVA).

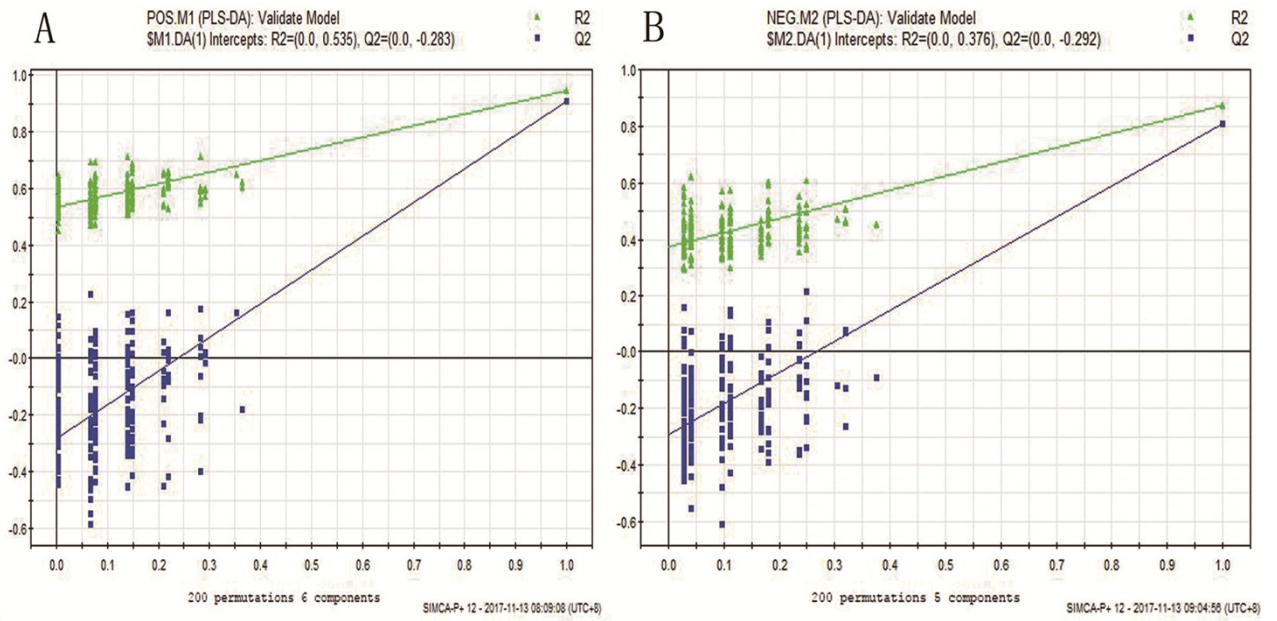

**Supplementary Figure 1.** Permutation test result of the PLS-DA models after 16 weeks treatment in the positive and negative modes. A, the positive mode; B, the negative mode. The R2Y value represents the goodness of fit of the model. The Q2 value represents the predictability of the models.

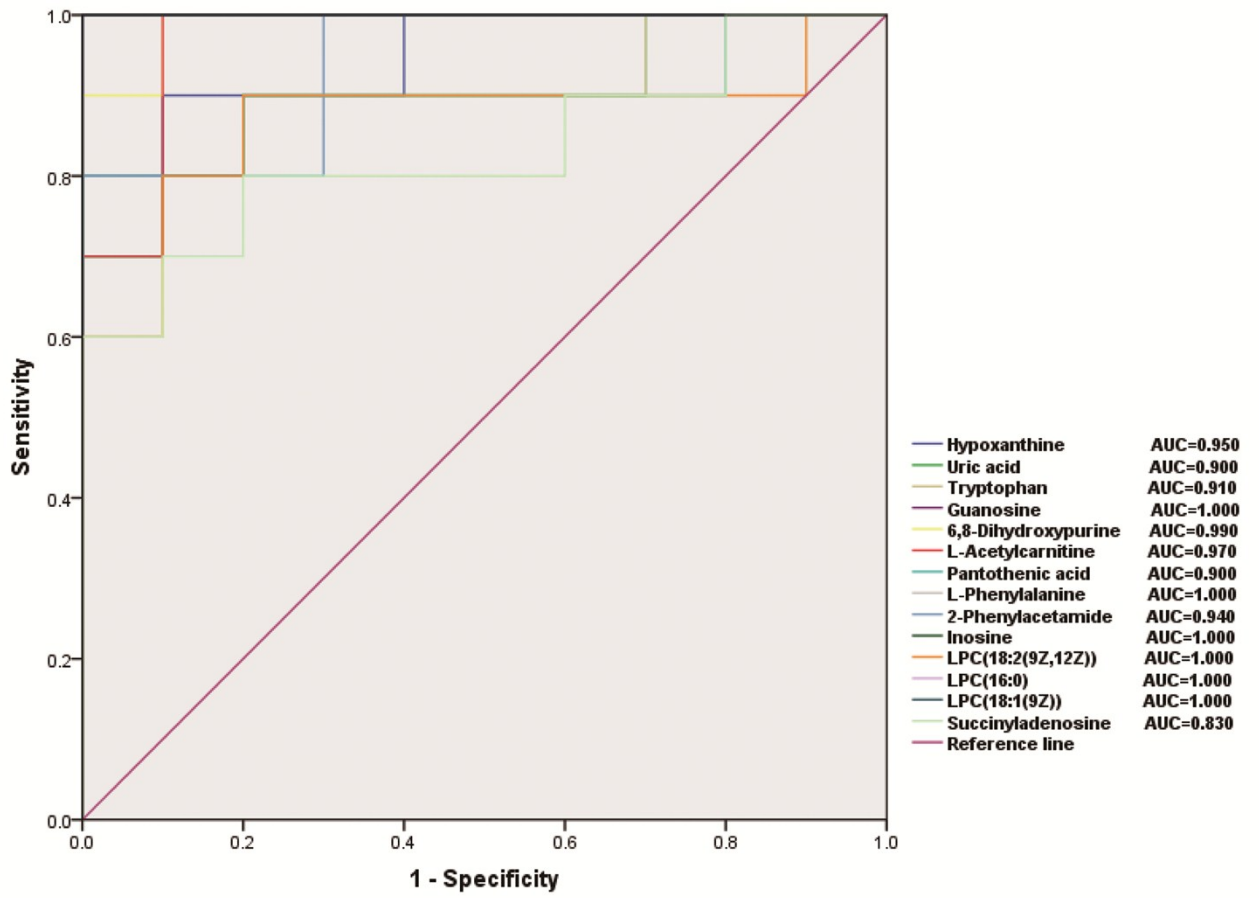

**Supplementary Figure 2.** ROC analysis for discrimination of the group AQ1 and group C for the 14 metabolites

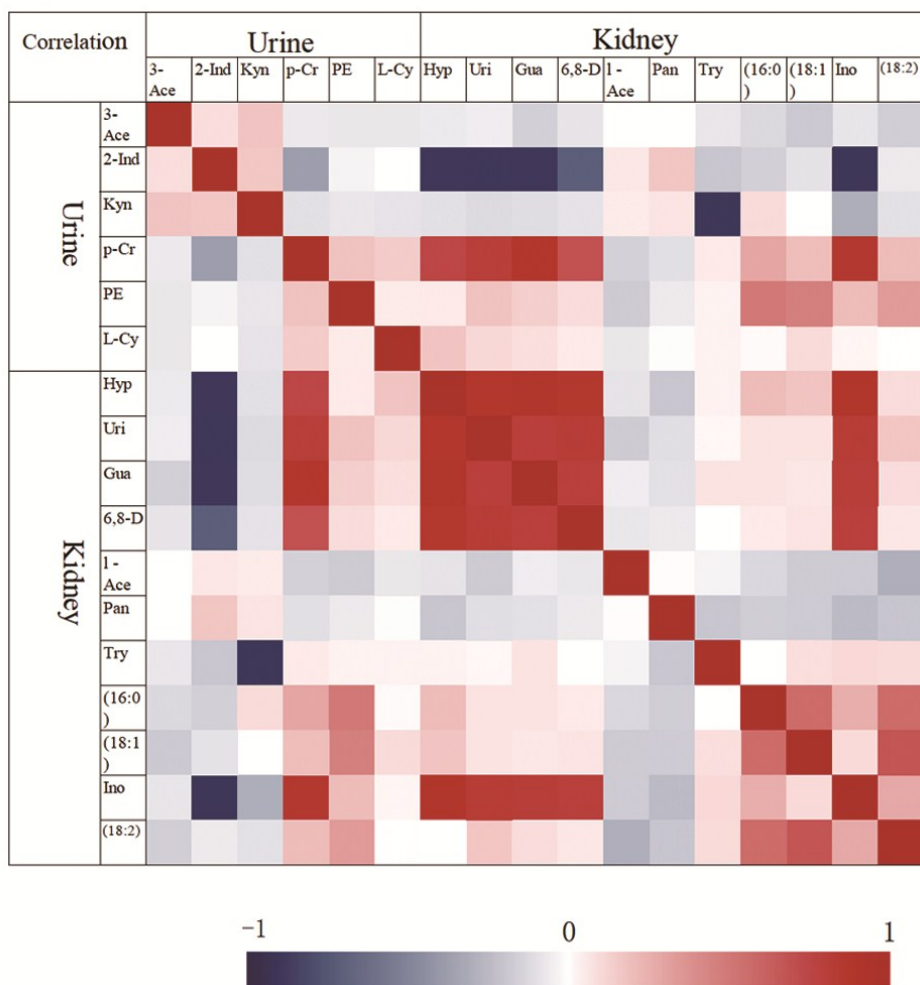

**Supplementary Figure 3.** Integration of urine and kidney metabolites correlations.

The pixel maps were derived from correlations between kidney and urine metabolites found to be significantly different with AA treatment. The cutoff value of 0.70 was applied to the absolute value of the coefficient [r] for displaying the strong correlations between metabolites. Correlation values are displayed as a color-coded pixel map according to correlation value (gradient of red colors for positive correlations and gradient of blue colors for negative correlations). Keys: 3-Ace, 3-Acetamidobutanol; 2-Ind, 2-Indolecarboxylic acid; Kyn, Kynurenic acid; p-Cr, p-Cresol sulfate; PE, phosphatidylethanolamine; L-Cy, L-Cysteine; Hyp, Hypoxanthine; Uri, Urid acid; Gua, Guanosine; 6,8-D, 6,8-Dihydroxypurine; l-Ace, l-Acetylcarnitine; Pan, Pantothenic acid; Try, Tryptophan; (16:0), lysophosphatidylcholine(16:0); (18:1), lysophosphatidylcholine(18:1(9z)); Ino, Inosine; (18:2), lysophosphatidylcholine(18:2(9z,12z)).
